# Supplementary material
Source: Springer Nature journal article supplement (https://www.springermedizin.de/resource/supplementary/12959_2013_229_MOESM2_ESM.pdf/9569254)

| <b>HIGH RISK</b> | <b>DAY -5</b>                                                                     | <b>DAY -4</b>                                                                     | <b>DAY -3</b>                                                                     | <b>DAY -2</b>                                                                      | <b>DAY -1</b>                                                                       | <b>DAY 0 SURGERY</b>                                                                |
|------------------|-----------------------------------------------------------------------------------|-----------------------------------------------------------------------------------|-----------------------------------------------------------------------------------|------------------------------------------------------------------------------------|-------------------------------------------------------------------------------------|-------------------------------------------------------------------------------------|
| <b>AM dose</b>   |  |  |  |  |  |  |
| <b>PM dose</b>   |  |  |  |  |  |                                                                                     |

| <b>LOW RISK</b> | <b>DAY -5</b>                                                                     | <b>DAY -4</b>                                                                     | <b>DAY -3</b>                                                                     | <b>DAY -2</b>                                                                      | <b>DAY -1</b>                                                                       | <b>DAY 0 SURGERY</b>                                                                |
|-----------------|-----------------------------------------------------------------------------------|-----------------------------------------------------------------------------------|-----------------------------------------------------------------------------------|------------------------------------------------------------------------------------|-------------------------------------------------------------------------------------|-------------------------------------------------------------------------------------|
| <b>AM dose</b>  |  |  |  |  |  |  |
| <b>PM dose</b>  |  |  |  |  |  |                                                                                     |

Skipped doses indicated by 

Supplement: MOESM2 [file 9569254]
